# Supplementary material for: Effects of fallow tillage on winter wheat yield and predictions under different precipitation types
Source: PeerJ. 2021 Dec 8;9:e12602. doi: 10.7717/peerj.12602 (PMC8667742; doi:10.7717/peerj.12602)
Supplement: Supplemental Information 1 — Supplement 1 includes meteorological data such as precipitation, air temperature, accumulated temperature and sunshine duration from 2009 to 2019, yield data after tillage in different fallow periods and data needed for Random Forest modeling [file peerj-09-12602-s001.xlsx]

## Sheet: Precipitation
			fallow stage(FS)	Sowing stage-Wintering stage(SS-WS)				Wintering stage-Jointing stage(WS-JS)			Jointing stage-Anthesis stage(JS-AS)			Anthesis stage-Mature stage(AS-MS)	Whole growth period	Annual precipitation
	June 21-June 30	July-September		October-November	December	January-March	April 1-April 10		April 11-April 30	May 1-May 10		May 11-May 30	June 1-June 20
2009	0.2	206	206.2	68.2	1.5	12.1	0.4	14	27.4	1.1	28.5	32.2	32.8	65	175.7	381.9
2010	0.1	389.9	390	35.5	0.1	26.7	13.3	40.1	6.2	18.1	24.3	26.8	0.3	27.1	127	517
2011	25.3	481.5	506.8	134.7	0.9	29.9	0.1	30.9	15.3	0.2	15.5	44.1	1	45.1	226.2	733
2012	16	202.9	218.9	23.8	1.9	13.9	12.8	28.6	10.9	14.2	25.1	82	13.2	95.2	172.7	391.6
2013	6.8	203.9	210.7	45	0	17.5	0.4	17.9	67.5	37.2	104.7	20.2	15.7	35.9	203.5	414.2
2014	25	447.4	472.4	27.5	1.2	42.3	29.1	72.6	20.4	18	38.4	17.1	12.2	29.3	167.8	640.2
2015	69.3	145.5	214.8	27.5	2.1	15.6	13.1	30.8	30.9	10	40.9	43.5	33.3	76.8	176	390.8
2016	39.6	144.6	184.2	123.1	13.3	25.3	35.2	73.8	10.4	15.6	26	29.8	47.6	77.4	300.3	484.5
2017	0.9	196	196.9	91.8	0	29.1	4.2	33.3	57.2	27.5	84.7	13.9	36.2	50.1	259.9	456.8
2018	0	234.4	234.4	16.7	0	8.9	20.9	29.8	26.2	0.4	36.7	4	29.5	41.4	124.6	359
1978-2018			284.6	51.2				37.4			37.6			80.2	206.4	491
	Table Precipitation distribution during both fallow and growing seasons
		2009-2010	2010-2011	2011-2012	2012-2013	2013-2014	2014-2015	2015-2016	2016-2017	2017-2018	2018-2019	1981-2017 Average	S.E.
	Fallow stage(FS)	206.2	390	506.8	218.9	210.7	472.4	214.8	184.2	196.9	234.4	284.6	123.3
	Sowing stage-Jointing stage(SS-JS)	82.2	75.6	165.6	52.4	62.9	100.1	58.3	196.9	125.1	46.5	88.6	50.95
	Jointing stage-Anthesis stage(JS-AS)	28.5	24.3	15.5	25.1	104.7	38.4	40.9	26	84.7	36.7	37.6	28.93
	Anthesis stage-Mature stage(AS-MS)	65	27.1	45.1	95.2	35.9	29.3	76.8	77.4	50.1	41.4	80.2	23.09
	Whole gorwth period	175.7	127	226.2	172.7	203.5	167.8	176	300.3	259.9	124.6	206.4	55.65
Total		381.9	517	733	391.6	414.2	640.2	390.8	484.5	456.8	359	491
	The data were from meteorological observation station of Wenxi County, Shanxi Province, China. Fallow stage was from the last 10 d of June to the last 10 d of September, before Sowing-Jointing stage was from the first 10 d of October to the first 10 d of April in the following year,
	Jointing - Anthesis stage was from the middle 10 d of April to the first 10 d of June. May, Anthesis - Maturity stage was from the middle 10 d of May to the middle 10 d of June.

## Sheet: Meteorological factors
		Sowing stage-Wintering stage				Wintering stage-Jointing stage				Jointing stage-Anthesis stage				Anthesis stage-Mature stage
Year	Falloe stage	Precipitation/mm	Sunshine/h	Effective accumulated temperature/℃	Average temperature/℃	Precipitation/mm	Sunshine/h	Effective accumulated temperature/℃	Average temperature/℃	Precipitation/mm	Sunshine/h	Effective accumulated temperature/℃	Average temperature/℃	Precipitation/mm	Sunshine/h	Effective accumulated temperature/℃	Average temperature/℃	Year	Precipitation in growth period/mm	Annual precipitation/mm	The proportion of precipitation in growth period to annual precipitation	Sunshine/h	accumulated temperature/℃	Average tempreature/℃	Precipitation anomaly in growth period	Average annual temperature anomaly
2009-2010	206.2	69.6	363.3	616.1	7.61	12.6	541.6	434.5	3.85	28.5	115.2	284.4	13.53	65	218.2	822.9	21.66	2009	175.7	381.9	0.460068	1238.3	2157.9	11.6625	-17.67	-1.7215
2010-2011	390	35.5	423.1	642.2	8.56	40.1	591.5	274.1	2.43	24.3	198.3	395.7	18.84	27.1	278.4	849.3	21.78	2010	127	517	0.245648	1491.3	2161.3	12.9025	-66.37	-0.4815
2011-2012	506.8	129.8	274.4	766.2	10.35	35.8	570.3	443.7	3.58	15.5	151	382.9	19.15	45.1	268.6	827.3	22.98	2011	226.2	733	0.308595	1264.3	2420.1	14.015	32.83	0.631
2012-2013	218.9	25.7	370.5	667.4	7.85	26.7	517.3	745.6	6.37	25.1	147.4	441	18.38	95.2	183.1	620.8	23.88	2012	172.7	391.6	0.441011	1218.3	2474.8	14.12	-20.67	0.736
2013-2014	210.7	32.3	400.6	786.4	10.21	30.6	444	672.2	5.6	104.7	119.6	351	16.71	35.9	270.3	759.8	22.35	2013	203.5	414.2	0.491309	1234.5	2569.4	13.7175	10.13	0.3335
2014-2015	472.4	27.6	272.7	678.8	10.44	72.5	545.7	547.6	4.45	38.4	186.1	401.1	17.44	29.3	237.2	791.4	21.39	2014	167.8	640.2	0.262106	1241.7	2418.9	13.43	-25.57	0.046
2015-2016	214.8	34.5	217.2	672.7	8.42	23.8	532.5	636.9	5.31	40.9	170.9	407.8	20.39	76.8	250.5	818.8	20.99	2015	176	390.8	0.450358	1171.1	2536.2	13.7775	-17.37	0.3935
2016-2017	184.2	136.4	332.9	778.7	8.46	60.5	343.7	649.1	6.18	26	217.5	403.9	18.36	77.4	168.8	861	22.66	2016	300.3	484.5	0.619814	1062.9	2692.7	13.915	106.93	0.531
2017-2018	196.9	75.9	128.3	549.1	9	49.2	369.1	490.6	4.09	84.7	66.8	367	15.96	50.1	265.9	827.3	21.77	2017	259.9	456.8	0.568958	830.1	2234	12.705	66.53	-0.679
2018-2019	234.4	41.2	201.1	660.8	9.47	5.3	540.7	641.2	4.75	36.7	142.5	341.8	19.42	41.4	251.1	1004.2	20.74	2018	124.6	359	0.347075	1135.4	2648	13.595	-68.77	0.211
																			193.37					13.384

## Sheet: Yield
		Yield (kg/ha)		Spike number (104/ha)		grain number per spike		1000-grains weight (g)
2009-2010	Deep ploughing	3923.57	4.35269	453.72	1.95143	23.78	0.179629	42.08	0.228619
	Subsoiling	3639.82	7.88302	427.18	3.29048	21.7	0.326599	39.035	0.306186
	No tillage	2714.96	2.86773	407.71	3.26599	20.375	0.224537	36.135	0.396001
2010-2011	Deep ploughing	4588.15	54.433	481.083	2.44949	28.375	0.102062	40.59	0.0408248
	Subsoiling	4794.56	22.5444	446.583	1.56495	28.2429	0.209956	43.58	0.179629
	No tillage	3705.67	30.2222	401.042	0.646393	26.2184	0.229902	40.51	0.0898146
2011-2012	Deep ploughing	5412.04	7.72406	603	3.26599	26.56	0.0244949	37.145	0.0857321
	Subsoiling	5612.45	8.89981	616.5	2.04124	26.735	0.00408248	38.625	0.0530723
	No tillage	4155.6	13.3905	485.5	2.85774	24.3304	0.0520316	35.435	0.0204124
2012-2013	Deep ploughing	3915.32	4.13964	350.25	0.832827	23.17	0.0163299	40.67	0.0816497
	Subsoiling	3140.25	12.1576	341.5	1.33089	22.29	0.277609	38.81	0.0408248
	No tillage	2608.3	10.492	300.25	1.55134	20.37	0	36.46	0.155134
2013-2014	Deep ploughing	4818.74	0.436009	466	0.253114	29.63	0.236784	41.5547	0.207945
	Subsoiling	4575.4	4.28661	454.41	0.485081	28.305	0.289856	41.0356	0.339377
	No tillage	3866.73	1.24305	386.65	1.86447	27.55	0.00816497	39.1248	0.412208
2014-2015	Deep ploughing	4806.55	4.74747	522.98	4.09881	29.72	0.424578	41.01	0.56194
	Subsoiling	4999.96	3.50658	488.333	0.544331	28.785	0.273526	40.3	0.0408248
	No tillage	3956.22	3.39663	417	3.55993	27.475	0.134722	39.14	0.155134
2015-2016	Deep ploughing	6009.75	97.2447	493.25	4.28661	36.23	0.367423	41.2563	0.367943
	Subsoiling	5719.07	93.795	484.5	1.63299	37.8	0.310269	39.1104	0.127804
	No tillage	4812	83.4051	425.75	2.24537	34.7833	0.070763	39.0558	0.153273
2016-2017	Deep ploughing	5032	34.9461	503.36	4.78467	35.57	0.193238	35.66	0.105001
	Subsoiling	4892	22.9844	496.25	5.51135	35.54	0.248791	34.21	0.0451573
	No tillage	4274	21.9229	452.12	8.88348	33.36	0.229479	33.12	0.200684
2017-2018	Deep ploughing	4657.53	20.7308	594	2.44949	25.4571	0.291606	38.075	0.110227
	Subsoiling	4093.03	24.0948	480	9.79796	25.2719	0.0455354	37.7671	0.0740162
	No tillage	3689.52	19.5633	430.4	3.40479	25.045	0.151052	37.85	0.122474
2018-2019	Deep ploughing	5227.48	272.266	334.5	8.57321	35.3	0.612372	47.1897	0.492449
	Subsoiling	4775.68	228.013	320.25	14.0846	31.6	0.449073	44.2156	0.405252
	No tillage	3711.16	41.1392	291.75	0.612372	29.5	0.0408248	43.118	0.327819

## Sheet: Figure
Precipitation Types	Year	Deep tillage	Subsoiling	No tillage	S.E.			Precipitation in fallow period											SS高DS	DS高SS
Normal	2009-2010	3923.57	3639.82	2714.96	4.35269	7.88302	2.86773	206.2												283.747
Normal	2010-2011	4588.15	4794.56	3705.67	54.433	22.5444	30.2222	390												-206.409
Normal	2011-2012	5412.04	5612.45	4155.6	7.72406	8.89981	13.3905	506.8											200.41
Normal	2012-2013	3915.32	3140.25	2608.3	4.13964	12.1576	10.492	218.9											-775.07
Drought	2013-2014	4818.74	4575.4	3866.73	0.436009	4.28661	1.24305	210.7											-243.34
Normal	2014-2015	4806.55	4999.96	3956.22	4.74747	3.50658	3.39663	472.4												-193.41
Drought	2015-2016	6009.75	5719.07	4812	97.2447	93.795	83.4051	214.8												290.675
Drought	2016-2017	5032	4892	4274	34.9461	22.9844	21.9229	184.2												140
Drought	2017-2018	4657.53	4093.03	3689.52	20.7308	24.0948	19.5633	196.9												564.5
Drought	2018-2019	5227.48	4775.68	3711.16	272.266	228.013	41.1392	234.4												451.794

## Sheet: Modeled data
				Average tempreature/℃	Sunshine/h	Water storage/mm
Year	Precipitation in fallow period/mm	Temperature in growth period/℃	Daily minimum temperatures/℃	Jointing stage-Anthesis stage	Jointing stage-Anthesis stage	Sowing stage	Jointing stage	Anthesis stage
2009	206.2	15.55	-14.8	13.53	115.2	338.477	263.98	207.818
2010	390	17.2033	-12.8	18.84	200.3	445.801	400.824	309.241
2011	506.8	18.6867	-13.5	19.15	151	603.271	529.385	366.238
2012	218.9	18.8267	-13.7	18.38	147.4	383.916	351.054	269.483
2013	210.7	18.29	-12.7	16.71	119.6	442.214	416.072	322.885
2015	214.8	18.37	-11.3	20.39	170.9	408.27	405.178	341.395
2016	184.2	18.5533	-13.6	18.36	217.5	414.801	451.49	315.27
2017	196.9	16.94	-10.1	15.96	66.8	416.255	422.2	311.96
2014	472.4	17.9067	-9.1	17.44	186.1	459.771	385.45	335.834
2018	234.4	18.1267	-12.7	19.42	142.5	438.404	421.086	329.184

## Sheet: predicted outcome
								Precipitation/mm	Precipitation/mm	Accumulated temperature/℃	Accumulated temperature/℃	Average tempreature/℃	Average tempreature/℃	Sunshine/h	Sunshine/h	Water storage of DS/mm	Water storage of DS/mm	Water storage of DS/mm	Water storage of SS/mm	Water storage of SS/mm	Water storage of SS/mm	Water storage of CK/mm	Water storage of CK/mm	Water storage of CK/mm	Actual yield			predicted yield			Error in predicting results/%			Meteorological yield			Predicted meteorological yield			Relative meteorological yield			Predicted relative meteorological yield			Ear number			Predicted ear number
Year	Precipitation in growth period/mm	Precipitation in fallow period/mm	Temperature in growth period/℃	Daily maximum temperatures/℃	Daily minimum temperatures/℃	Sunshine/h	Accumulated temperature/℃	SS-JS	JS-AS	SS-JS	JS-AS	SS-JS	JS-AS	SS-JS	JS-AS	SS	JS	AS	SS	JS	AS	SS	JS	AS	DS	SS	CK	DSpredict	SSpredict	CKpredict	DS	SS	CK	DS	SS	CK	DSpredict	SSpredict	CKpredict	DS	SS	CK	DSpredict	SSpredict	CKpredict	DS	SS	CK	DSpredict
2009	175.7	206.2	15.55	40	-14.8	1238.3	2157.9	82.2	27.4	1050.6	284.4	5.73	13.53	904.9	115.2	429.795	385.29	297.787	401.014	353.01	278.505	338.477	263.98	207.818	3923.57	3639.82	2714.96	4283.53	3835.16	3012.48	0.0917451	0.0536667	0.109586	1961.78	1819.91	1357.48	1298.5	992.226	932.98	1	1	1	0.62868	0.66337	0.65675	453.72	427.18	407.71	458.352
2010	127	390	17.2033	41.2	-12.8	1491.3	2161.3	105.64	6.2	916.3	395.7	5.5	18.84	996.6	200.3	515.649	422.653	322.219	487.246	414.075	313.802	445.801	400.824	309.241	4588.15	4794.56	3705.67	4676.75	4791.83	3761.26	0.0193114	0.000568781	0.0150014	986.218	1184	947.849	770.122	924.925	789.034	0.273803	0.327929	0.343695	0.3023	0.29055	0.35058	481.083	446.583	401.042	483.934
2011	226.2	506.8	18.6867	38.6	-13.5	1264.3	2420.1	171.4	10.3	1209.9	382.9	6.97	19.15	844.7	151	657.292	550.171	418.899	677.184	563.756	405.752	603.271	529.385	366.238	5412.04	5612.45	4155.6	5208.05	5241.97	4065.82	0.0376911	0.0660105	0.0216051	522.71	601.403	390.084	409.575	449.856	327.273	0.106908	0.120016	0.103594	0.092892	0.14951	0.11154	603	616.5	485.5	552.615
2012	172.7	218.9	18.8267	39.6	-13.7	1218.3	2474.8	65.5	25.1	1413	441	7.11	18.38	887.8	147.4	448.419	409.46	316.945	429.367	390.627	301.888	383.916	351.054	269.483	3915.32	3140.25	2608.3	4263.74	3877.02	3051.83	0.0889878	0.234621	0.170046	-611.044	-1099.78	-698.662	-32.0049	-249.315	-86.2358	-0.134997	-0.259381	-0.21127	0.04794	-0.0040341	0.015951	350.25	341.5	300.25	422.667
2014	167.8	472.4	17.9067	40.3	-9.1	1241.7	2418.9	104.8	14.7	1226.4	401.1	7.45	17.44	818.4	186.1	530.963	480.76	378.503	513.642	459.324	354.03	459.771	385.45	335.834	4806.55	4999.96	3956.22	4879.21	4845.06	3860.3	0.0151177	0.0309796	0.0242463	-350.193	-537.331	-381.907	237.786	249.177	218.958	-0.0699306	-0.116045	-0.0938017	0.10577	0.14732	0.12283	522.98	488.333	417	501.479
2013	203.5	210.7	18.29	39.1	-12.7	1234.5	2569.4	99.3	46.8	1458.6	351	7.91	16.71	844.6	119.6	504.095	449.729	352.529	485.304	428.894	339.926	442.214	416.072	322.885	4818.74	4575.4	3866.73	4850.41	4626.02	3919.66	0.00657307	0.0110633	0.0136881	202.257	305.542	371.33	335.188	319.64	309.092	0.0438118	0.0715578	0.106234	0.06269	0.11586	0.091182	466	454.41	386.65	492.912
2015	176	214.8	18.37	38.4	-11.3	1171.1	2536.2	99.8	6.1	1309.6	407.8	6.87	20.39	749.7	170.9	425.13	425.301	349.904	436.593	455.325	362.944	408.27	405.178	341.395	6009.75	5719.07	4812	5283.64	5175.11	4170.89	0.120821	0.0951147	0.133233	144.473	451.469	254.484	311.187	396.602	295.982	0.030989	0.0992571	0.0687472	0.099169	0.093109	0.098034	493.25	484.5	425.75	552.758
2016	300.3	184.2	18.5533	39.2	-13.6	1062.9	2692.7	179.4	36.5	1427.8	403.9	7.32	18.36	676.6	217.5	449.024	478.205	323.485	479.815	494.14	320.765	414.801	451.49	315.27	5032	4892	4274	4925.96	4789.95	3958.87	0.0210725	0.0208615	0.0737318	599.57	430.319	442.805	377.135	296.332	294.139	0.110823	0.0813649	0.101347	0.060307	0.061993	0.089915	503.36	496.25	452.12	514.135
2017	259.9	196.9	16.94	41.6	-10.1	830.1	2634	137.1	61.4	1439.7	367	6.55	15.96	497.4	66.8	434.905	472.85	352.45	437.925	436.33	335.335	416.255	422.2	311.96	4657.53	4093.03	3689.52	4767.79	4398.23	3753.52	0.0236725	0.0745652	0.0173452	-288.341	-293.684	-126.37	132.756	72.3658	156.015	-0.0541959	-0.0566336	-0.028718	0.053304	0.048626	0.076703	594	480	430.4	496.903
2018	206.4	234.4	18.1267	38.9	-12.7	1135.4	2648	115.5	36.6	1302	341.8	7.11	19.42	741.8	142.5	478.693	462.668	376.485	509.11	496.199	331.736	438.404	421.086	329.184	5227.48	4775.68	3711.16	5093.7	4824.74	3974.16	0.02559	0.0102734	0.0708664	222.561	208.164	-86.5908	299.945	356.707	211.496	0.0444685	0.045575	-0.0228005	0.044146	0.081437	0.075432	334.5	320.25	291.75	492.664
[truncated: 14 more columns]
